# Supplementary material for: Techno-economic assessment of biodiesel-derived crude glycerol purification processes
Source: Royal Society of Chemistry journal article supplement (doi:10.1039/d4su00599f), 2025-01-01
Supplement: d4su00599f1.pdf [file d4su00599f1.pdf]

## **Electronic Supplementary Information (ESI)**

### **Techno-economic assessment of biodiesel-derived crude glycerol purification processes**

Yash Bansod<sup>1</sup>, Kamran Ghasemzadeh<sup>1</sup> and Carmine D'Agostino<sup>1,2×</sup>

<sup>1</sup> Department of Chemical Engineering, University of Manchester, Manchester, M13 9PL, UK

<sup>2</sup> Dipartimento di Ingegneria Civile, Chimica, Ambientale e dei Materiali (DICAM), Alma Mater Studiorum – Università di Bologna, Via Terracini, 28, 40131 Bologna, Italy

× Corresponding author

Carmine D'Agostino

Email: [carmine.dagostino@manchester.ac.uk](mailto:carmine.dagostino@manchester.ac.uk)

# 1. Economic Analysis

## 1.1. Capital and operating costs

**Table S1.** Types of capital costs and calculation method used.

| <b>Economics Parameters</b>                 | <b>Calculation Method</b>                                            |
|---------------------------------------------|----------------------------------------------------------------------|
| Total Installed Cost                        | $\Sigma$ Installation factor $\times$ Equipment Cost                 |
| Battery Limits Investment (BLI) contingency | $0.25 \times$ Total Installed Cost                                   |
| Battery Limits Investment (BLI)             | Total Equipment Cost + Total Installed Cost + BLI Contingency        |
| Offsite Costs +General Services Facilities  | $0.35 \times$ BLI                                                    |
| Contingency Offsite Cost (20%)              | $0.20 \times$ (Offsite Costs +General Services Facilities)           |
| Total Offsite Cost (TOC)                    | Offsite Costs +General Services Facilities+ Contingency Offsite Cost |
| Total Fix Capital (TFC)                     | TOC + BLI                                                            |
| Total Working Capital (TWC)                 | $0.25 \times$ TFC                                                    |
| Total Capital Investment (TCI)              | TFC + TWC                                                            |

**Table S2.** Types of operating costs and calculation method used.

| <b>Economics Parameters</b>             | <b>Calculation Method</b>                                                                              |
|-----------------------------------------|--------------------------------------------------------------------------------------------------------|
| Variable Cost                           | Total Raw Material Cost + Total Utility Cost                                                           |
| Number of Shifts                        | 3                                                                                                      |
| Operating Labor Cost                    | (6 Plant Operators per annum + 3 Plant Managers per annum) $\times$ Number of shifts/7920/Product rate |
| Maintenance Labor Cost                  | $0.016 \times$ Battery Limits Investment                                                               |
| Control Lab Labor Cost                  | $0.15 \times$ Operating Labor Cost                                                                     |
| Labor Costs                             | Operating Labor Cost+ Maintenance Labor + Control Lab labor                                            |
| Maintenance Materials Cost              | $0.024 \times$ Battery Limits Investment                                                               |
| Operating Supplies Cost                 | $0.1 \times$ Operating Labor Cost                                                                      |
| Total Direct Cost (TDC)                 | Variable Cost + Labor Cost + Maintenance Materials Cost + Operating Supplies Cost                      |
| Plant Overhead Cost                     | $0.6 \times$ Labor Cost                                                                                |
| Taxes and Insurance                     | $0.02 \times$ TFC                                                                                      |
| Plant Cash Costs                        | TDC + Plant Overhead + Taxes and Insurance                                                             |
| Depreciation                            | $0.1 \times$ TFC                                                                                       |
| Plant Gate Costs                        | Plant Cash Costs+ Depreciation                                                                         |
| G&A Sales Research                      | $0.065 \times$ Plant Gates Costs                                                                       |
| Net Production Costs                    | Plant Gate Costs + G&A Sales Research                                                                  |
| Return on Investment (ROI) before taxes | $0.15 \times$ TFC                                                                                      |
| Production cost                         | Net Production cost+ ROI before taxes+CO <sub>2</sub> Separation Cost                                  |
| Profit                                  | Acrylic acid selling price-Production cost                                                             |

**Table S3.** Breakdown of capital costs of the four acrylic acid production routes.

| Type of costs (in MUSD)                     | Process |      |      |
|---------------------------------------------|---------|------|------|
|                                             | MBP     | VDP  | IEP  |
| Total Equipment Cost                        | 0.74    | 0.56 | 0.75 |
| Total Installed Cost                        | 2.79    | 2.05 | 2.81 |
| BLI Contingency                             | 0.70    | 0.51 | 0.70 |
| Battery Limits Investment                   | 4.22    | 3.13 | 4.25 |
| Offsite Costs + General Services Facilities | 1.48    | 1.09 | 1.49 |
| Contingency Offsite Cost, 20%               | 0.30    | 0.22 | 0.30 |
| Total Offsite Cost                          | 1.77    | 1.31 | 1.79 |
| Total Fix Capital (TFC)                     | 6.00    | 4.44 | 6.04 |
| Total Working Capital (TWC)                 | 1.50    | 1.11 | 1.51 |
| Total Capital Cost                          | 7.50    | 5.55 | 7.55 |

**Table S4.** Breakdown of production costs of the four acrylic acid production routes.

| Type of costs (in USD/tonne)                | Process |         |         |
|---------------------------------------------|---------|---------|---------|
|                                             | MBP     | VDP     | IEP     |
| Raw Materials                               | -85.61  | -404.02 | 3094.96 |
| Utilities                                   | 476.26  | 294.01  | 125.89  |
| Variable Costs (Raw Materials + Utilities)  | 390.65  | -110.01 | 3220.84 |
| Operating Labor                             | 391.85  | 391.85  | 391.85  |
| Maintenance Labor, 1.6% of BLI              | 0.07    | 0.05    | 0.07    |
| Control Lab labour, 15% of operating labour | 58.78   | 58.78   | 58.78   |
| Labor Costs                                 | 450.70  | 450.68  | 450.70  |
| Maintenance Materials, 2.4% of BLI          | 34.87   | 24.16   | 32.15   |
| Operating Supplies, 10% of operating labour | 39.19   | 39.19   | 39.19   |
| Total Direct Cost                           | 915.40  | 404.01  | 3742.88 |
| Plant Overhead, 60% of Labor Cost           | 270.42  | 270.41  | 270.42  |
| Taxes and insurance, 2% of TFC              | 41.26   | 28.59   | 38.05   |
| Plant Cash Costs                            | 1227.08 | 703.00  | 4051.34 |
| Depreciation, 10% of TFC                    | 206.30  | 142.94  | 190.24  |
| Plant Gate Costs                            | 1433.38 | 845.94  | 4241.58 |
| G&A sales research                          | 93.17   | 54.99   | 275.70  |
| Net Production Cost                         | 1526.55 | 900.93  | 4517.28 |
| ROI before taxes, 15% of TFC                | 309.46  | 214.41  | 285.36  |
| Methanol Sales (380 USD/tonne)              |         | 293.72  | 307.89  |
| Product Value                               | 1836.01 | 821.62  | 4494.75 |
| Profit                                      | -       | 78.38   | -       |
| Annual Profit (MUSD/year)                   | -2.72   | 0.24    | -11.42  |
| Payback period (years)                      | -       | 18.24   | -       |
| ROI (%)                                     | -       | 5.48    | -       |

## 1.2. Equipment and installation costs

**Table S5.** Equipment and installation costs for MBP process.

| MBP                     |                               |          |                |                       |                          |       |
|-------------------------|-------------------------------|----------|----------------|-----------------------|--------------------------|-------|
| Pumps                   |                               | Values   | Units          | Equipment Cost (2024) | Installation Cost (2024) | Units |
| PUMP-1                  | Single Stage Centrifugal Flow | 0.445    | Litres/s       | 0.024                 | 0.059                    | MUSD  |
| Heat Exchangers         |                               | Values   | Units          | Equipment Cost (2024) | Installation Cost (2024) | Units |
| COOLER-3                | Shell & Tube Heat Transfer    | 0.457    | m <sup>2</sup> | 0.041                 | 0.142                    | MUSD  |
| HEATER-1                | Shell & Tube Heat Transfer    | 0.581    | m <sup>2</sup> | 0.041                 | 0.142                    | MUSD  |
| HEATER-2                | Shell & Tube Heat Transfer    | 5.811    | m <sup>2</sup> | 0.041                 | 0.144                    | MUSD  |
| COOLER-4                | Shell & Tube Heat Transfer    | 3.665    | m <sup>2</sup> | 0.041                 | 0.143                    | MUSD  |
| COOLER-1                | Shell & Tube Heat Transfer    | 6.716    | m <sup>2</sup> | 0.041                 | 0.145                    | MUSD  |
| HEATER-3                | Shell & Tube Heat Transfer    | 11.520   | m <sup>2</sup> | 0.042                 | 0.147                    | MUSD  |
| Column & Vessels        |                               | Values   | Units          | Equipment Cost (2024) | Installation Cost (2024) | Units |
| FLASH-1                 | Vertical, SS                  | 84.397   | kg             | 0.019                 | 0.076                    | MUSD  |
| FLASH-2                 | Vertical, SS                  | 28.287   | kg             | 0.018                 | 0.071                    | MUSD  |
| FLASH-3                 | Vertical, SS                  | 45.633   | kg             | 0.018                 | 0.072                    | MUSD  |
| LIQUID-LIQUID EXTRACTOR | Trays Diameter, 50            | 0.677    | m              | 0.005                 | 0.020                    | MUSD  |
| LIQUID-LIQUID EXTRACTOR | Main Tower Shell Mass         | 738.750  | kg             | 0.057                 | 0.227                    | MUSD  |
| Reactors                |                               | Values   | Units          | Equipment Cost (2024) | Installation Cost (2024) | Units |
| REACTOR-3               | Reactor vessel                | 0.000    | m <sup>3</sup> | 0.089                 | 0.357                    | MUSD  |
| REACTOR-1               | Reactor vessel                | 0.001    | m <sup>3</sup> | 0.089                 | 0.357                    | MUSD  |
| REACTOR-2               | Reactor vessel                | 0.006    | m <sup>3</sup> | 0.090                 | 0.360                    | MUSD  |
| Separators              |                               | Values   | Units          | Equipment Cost (2024) | Installation Cost (2024) | Units |
| ACTIVATED CARBON        | Trays Diameter, 10            | 0.184    | m              | 0.002                 | 0.009                    | MUSD  |
| ACTIVATED CARBON        | Main Tower Shell Mass         | 28.777   | kg             | 0.027                 | 0.109                    | MUSD  |
| OIL-SEPARATOR           | Volume                        | 1761.250 | L              | 0.014                 | 0.056                    | MUSD  |
| MEMBRANE UNIT           | Membrane                      | 0.237    | m <sup>2</sup> | 0.100                 | 0.288                    | MUSD  |

**Table S6.** Equipment and installation costs for VDP process.

| VDP                               |                                  |          |                |                       |                          |       |
|-----------------------------------|----------------------------------|----------|----------------|-----------------------|--------------------------|-------|
| Pumps                             |                                  | Values   | Units          | Equipment Cost (2024) | Installation Cost (2024) | Units |
| PUMP-1                            | Single Stage Centrifugal Flow    | 0.089    | Litres/s       | 0.023                 | 0.058                    | MUSD  |
| Heat Exchangers and Reboilers     |                                  | Values   | Units          | Equipment Cost (2024) | Installation Cost (2024) | Units |
| COOLER-1                          | Shell & Tube Heat Transfer       | 0.199    | m <sup>2</sup> | 0.041                 | 0.142                    | MUSD  |
| HEATER-1                          | Shell & Tube Heat Transfer       | 0.724    | m <sup>2</sup> | 0.041                 | 0.142                    | MUSD  |
| CONDENSER (DISTILLATION COLUMN-2) | Shell & Tube Heat Transfer       | 20.750   | m <sup>2</sup> | 0.044                 | 0.153                    | MUSD  |
| CONDENSER (DISTILLATION COLUMN-1) | Shell & Tube Heat Transfer       | 59.590   | m <sup>2</sup> | 0.051                 | 0.179                    | MUSD  |
| FLASH (Heat exchanger)            | Shell & Tube Heat Transfer       | 8.787    | m <sup>2</sup> | 0.042                 | 0.146                    | MUSD  |
| VACFLASH (Heat exchanger)         | Shell & Tube Heat Transfer       | 11.640   | m <sup>2</sup> | 0.042                 | 0.147                    | MUSD  |
| REBOILER (DISTILLATION COLUMN-2)  | U-type Kettle Reboiler           | 1.731    | m <sup>2</sup> | 0.043                 | 0.151                    | MUSD  |
| REBOILER (DISTILLATION COLUMN-1)  | U-type Kettle Reboiler           | 0.414    | m <sup>2</sup> | 0.042                 | 0.148                    | MUSD  |
| Column & Vessels                  |                                  | Values   | Units          | Equipment Cost (2024) | Installation Cost (2024) | Units |
| DISTILLATION COLUMN-2             | Sieve Trays Diameter, Main Tower | 0.851    | m              | 0.005                 | 0.021                    | MUSD  |
| DISTILLATION COLUMN-2             | Shell Mass                       | 1330.466 | kg             | 0.077                 | 0.308                    | MUSD  |
| DISTILLATION COLUMN-2             | Horizontal, SS Sieve Trays       | 168.402  | kg             | 0.018                 | 0.073                    | MUSD  |
| DISTILLATION COLUMN-1             | Sieve Trays Diameter, Main Tower | 0.313    | m              | 0.002                 | 0.009                    | MUSD  |
| DISTILLATION COLUMN-1             | Shell Mass                       | 259.137  | kg             | 0.038                 | 0.153                    | MUSD  |
| CONDENSER (DISTILLATION COLUMN-1) | Horizontal, SS                   | 270.646  | kg             | 0.020                 | 0.080                    | MUSD  |
| Flash drums                       |                                  | Values   | Units          | Equipment Cost (2024) | Installation Cost (2024) | Units |
| FLASH-1                           | Vertical, SS                     | 26.578   | kg             | 0.018                 | 0.071                    | MUSD  |
| FLASH-2                           | Vertical, SS                     | 0.666    | kg             | 0.017                 | 0.067                    | MUSD  |

**Table S7.** Equipment and installation costs for VDP process.

| IEP                               |                               |         |                   |                       |                          |       |
|-----------------------------------|-------------------------------|---------|-------------------|-----------------------|--------------------------|-------|
| Pumps                             |                               | Values  | Units             | Equipment Cost (2024) | Installation Cost (2024) | Units |
| PUMP-1                            | Single Stage Centrifugal Flow | 0.283   | Litres/s          | 0.023                 | 0.059                    | MUSD  |
| Heat Exchangers and Reboilers     |                               | Values  | Units             | Equipment Cost (2024) | Installation Cost (2024) | Units |
| COOLER-3                          | Shell & Tube Heat Transfer    | 0.802   | m <sup>2</sup>    | 0.041                 | 0.142                    | MUSD  |
| HEATER-1                          | Shell & Tube Heat Transfer    | 0.435   | m <sup>2</sup>    | 0.041                 | 0.142                    | MUSD  |
| Heater (REACTOR-1)                | Shell & Tube Heat Transfer    | 0.655   | m <sup>2</sup>    | 0.000                 | 0.000                    | MUSD  |
| HEATER-2                          | Shell & Tube Heat Transfer    | 1.362   | m <sup>2</sup>    | 0.041                 | 0.143                    | MUSD  |
| Condenser (DISTILLATION COLUMN-1) | Shell & Tube Heat Transfer    | 1.031   | m <sup>2</sup>    | 0.041                 | 0.142                    | MUSD  |
| Heater (REACTOR-3)                | Shell & Tube Heat Transfer    | 49.200  | m <sup>2</sup>    | 0.000                 | 0.000                    | MUSD  |
| COOLER-2                          | Shell & Tube Heat Transfer    | 1.415   | m <sup>2</sup>    | 0.041                 | 0.143                    | MUSD  |
| Reboiler (DISTILLATION COLUMN-1)  | U-type Kettle Reboiler        | 1.188   | m <sup>2</sup>    | 0.043                 | 0.150                    | MUSD  |
| COOLER-1                          | Shell & Tube Heat Transfer    | 0.502   | m <sup>2</sup>    | 0.041                 | 0.142                    | MUSD  |
| Column & Vessels                  |                               | Values  | Units             | Equipment Cost (2024) | Installation Cost (2024) | Units |
| DISTILLATION COLUMN-1             | Sieve Trays Diameter,         | 0.222   | m                 | 0.002                 | 0.007                    | MUSD  |
| DISTILLATION COLUMN-1             | Main Tower Shell Mass         | 228.747 | kg                | 0.037                 | 0.147                    | MUSD  |
| Condenser (DISTILLATION COLUMN-1) | Horizontal, SS                | 42.100  | kg                | 0.016                 | 0.064                    | MUSD  |
| Reactors                          |                               | Values  | Units             | Equipment Cost (2024) | Installation Cost (2024) | Units |
| REACTOR-3                         | Reactor vessel                | 0.015   | m <sup>3</sup>    | 0.091                 | 0.364                    | MUSD  |
| REACTOR-1                         | Reactor vessel                | 0.000   | m <sup>3</sup>    | 0.089                 | 0.357                    | MUSD  |
| Separators                        |                               | Values  | Units             | Equipment Cost (2024) | Installation Cost (2024) | Units |
| CENTRIFUGE                        | Throughput                    | 1.021   | m <sup>3</sup> /h | 0.088                 | 0.353                    | MUSD  |
| ION-EXCHANGE COLUMN               | Column Volume                 | 27.834  | m <sup>3</sup>    | 0.113                 | 0.452                    | MUSD  |

## 2. Mass balance

### 2.1. Mass balance for MBP process

Table S8. Mass balance results for MBP process.

| MBP                  |          |                         |           |           |           |               |          |          |          |         |          |
|----------------------|----------|-------------------------|-----------|-----------|-----------|---------------|----------|----------|----------|---------|----------|
| Stream Name          | CRUDEGLY | EXTRACT                 | HCL       | KOH       | KOH-2     | LIGHT         | LIQ-WAST | LIQWAST2 | METHANOL | PE-SOLV | PERMEATE |
| From                 |          | LIQUID-LIQUID EXTRACTOR |           |           |           | OIL-SEPARATOR | FLASH-1  | FLASH-3  |          |         | MEMBRANE |
| To                   | MIXER-2  | FLASH-1                 | REACTOR-2 | REACTOR-1 | REACTOR-3 |               |          |          | MIXER-1  | MIXER-3 | FLASH-2  |
| Temperature (°C)     | 25.0     | 112.4                   | 25.0      | 25.0      | 25.0      | 125.0         | 20.0     | 70.0     | 25.0     | 25.0    | 25.2     |
| Pressure (bar)       | 1.0      | 1.0                     | 1.0       | 1.0       | 1.0       | 1.0           | 0.7      | 1.0      | 1.0      | 1.0     | 4.5      |
| Mole Flows (kmol/hr) | 17.6     | 9.0                     | 3.9       | 2.2       | 1.1       | 6.4           | 4.9      | 9.8      | 1.4      | 0.5     | 42.6     |
| Mole Fractions       |          |                         |           |           |           |               |          |          |          |         |          |
| GLYCEROL             | 0.2468   | 0.0445                  | 0.0000    | 0.0000    | 0.0000    | 0.0225        | 0.0814   | 0.0055   | 0.0000   | 0.0000  | 0.0891   |
| METHANOL             | 0.5320   | 0.4203                  | 0.0000    | 0.0000    | 0.0000    | 0.1823        | 0.6593   | 0.6462   | 1.0000   | 0.0000  | 0.7215   |
| M-OLEATE             | 0.0192   | 0.0000                  | 0.0000    | 0.0000    | 0.0000    | 0.0005        | 0.0000   | 0.0000   | 0.0000   | 0.0000  | 0.0000   |
| OLE-ACID             | 0.0267   | 0.0000                  | 0.0000    | 0.0000    | 0.0000    | 0.0727        | 0.0001   | 0.0000   | 0.0000   | 0.0000  | 0.0001   |
| WATER                | 0.1577   | 0.0855                  | 0.7751    | 0.7342    | 0.7342    | 0.6647        | 0.1502   | 0.3483   | 0.0000   | 0.0000  | 0.1891   |
| PENTANE              | 0.0000   | 0.3325                  | 0.0000    | 0.0000    | 0.0000    | 0.0000        | 0.0926   | 0.0000   | 0.0000   | 1.0000  | 0.0000   |
| HEXANE               | 0.0000   | 0.0000                  | 0.0000    | 0.0000    | 0.0000    | 0.0000        | 0.0000   | 0.0000   | 0.0000   | 0.0000  | 0.0000   |
| HCL                  | 0.0000   | 0.1114                  | 0.2249    | 0.0000    | 0.0000    | 0.0017        | 0.0059   | 0.0000   | 0.0000   | 0.0000  | 0.0000   |
| KCL                  | 0.0000   | 0.0058                  | 0.0000    | 0.0000    | 0.0000    | 0.0029        | 0.0106   | 0.0000   | 0.0000   | 0.0000  | 0.0002   |
| KOH                  | 0.0177   | 0.0000                  | 0.0000    | 0.2658    | 0.2658    | 0.0009        | 0.0000   | 0.0000   | 0.0000   | 0.0000  | 0.0001   |
| K-OLEATE             | 0.0000   | 0.0000                  | 0.0000    | 0.0000    | 0.0000    | 0.0518        | 0.0001   | 0.0000   | 0.0000   | 0.0000  | 0.0000   |

Table S8 continued...

| Stream Name                     | PURE-GLY            | REC-MEOH | RECOV-PE | RETENT   | S1          | S2           | S3        | S4        | S5        | S6                | S7                |
|---------------------------------|---------------------|----------|----------|----------|-------------|--------------|-----------|-----------|-----------|-------------------|-------------------|
| <b>From</b>                     | ACTIVATED<br>CARBON | COOLER-4 | COOLER-2 | MEMBRANE | MIXER-<br>1 | MIXER-2      | HEATER-1  | REACTOR-1 | REACTOR-2 | HEATER-2          | OIL-<br>SEPARATOR |
| <b>To</b>                       |                     | MIXER-1  | MIXER-3  |          | MIXER-<br>2 | HEATER-<br>1 | REACTOR-1 | REACTOR-2 | HEATER-2  | OIL-<br>SEPARATOR | COOLER-1          |
| <b>Temperature (°C)</b>         | 25.0                | 25.0     | 100.0    | 25.2     | 25.0        | 24.7         | 60.0      | 60.0      | 60.0      | 125.0             | 125.0             |
| <b>Pressure (bar)</b>           | 1.0                 | 1.0      | 1.0      | 4.5      | 1.0         | 1.0          | 1.0       | 1.0       | 1.0       | 1.0               | 1.0               |
| <b>Mole Flows<br/>(kmol/hr)</b> | 4.7                 | 28.1     | 4.1      | 0.8      | 29.5        | 47.1         | 47.1      | 49.3      | 53.2      | 53.2              | 46.8              |
| <b>Mole Fractions</b>           |                     |          |          |          |             |              |           |           |           |                   |                   |
| <b>GLYCEROL</b>                 | 0.8032              | 0.0000   | 0.0000   | 0.0000   | 0.0000      | 0.0923       | 0.0923    | 0.0881    | 0.0816    | 0.0816            | 0.0897            |
| <b>METHANOL</b>                 | 0.0653              | 0.8584   | 0.1319   | 0.0000   | 0.8649      | 0.7404       | 0.7404    | 0.7138    | 0.6611    | 0.6611            | 0.7264            |
| <b>M-OLEATE</b>                 | 0.0000              | 0.0000   | 0.0000   | 0.0000   | 0.0000      | 0.0072       | 0.0072    | 0.0001    | 0.0001    | 0.0001            | 0.0000            |
| <b>OLE-ACID</b>                 | 0.0009              | 0.0000   | 0.0000   | 0.0000   | 0.0000      | 0.0100       | 0.0100    | 0.0095    | 0.0088    | 0.0088            | 0.0001            |
| <b>WATER</b>                    | 0.1290              | 0.1416   | 0.0074   | 0.0000   | 0.1351      | 0.1435       | 0.1435    | 0.1702    | 0.2254    | 0.2254            | 0.1655            |
| <b>PENTANE</b>                  | 0.0000              | 0.0000   | 0.6220   | 0.0000   | 0.0000      | 0.0000       | 0.0000    | 0.0000    | 0.0000    | 0.0000            | 0.0000            |
| <b>HEXANE</b>                   | 0.0000              | 0.0000   | 0.0000   | 0.0000   | 0.0000      | 0.0000       | 0.0000    | 0.0000    | 0.0000    | 0.0000            | 0.0000            |
| <b>HCL</b>                      | 0.0000              | 0.0000   | 0.2386   | 0.0000   | 0.0000      | 0.0000       | 0.0000    | 0.0000    | 0.0060    | 0.0060            | 0.0066            |
| <b>KCL</b>                      | 0.0012              | 0.0000   | 0.0000   | 0.9961   | 0.0000      | 0.0000       | 0.0000    | 0.0000    | 0.0106    | 0.0106            | 0.0116            |
| <b>KOH</b>                      | 0.0004              | 0.0000   | 0.0000   | 0.0000   | 0.0000      | 0.0066       | 0.0066    | 0.0116    | 0.0001    | 0.0001            | 0.0000            |
| <b>K-OLEATE</b>                 | 0.0000              | 0.0000   | 0.0000   | 0.0039   | 0.0000      | 0.0000       | 0.0000    | 0.0068    | 0.0063    | 0.0063            | 0.0001            |



Table S8 continued...

| Stream Name                 | S8                      | S9                      | S10      | S11                     | S12       | S13     | S14      | S15      | S16     | S17              | S18              | S19      |
|-----------------------------|-------------------------|-------------------------|----------|-------------------------|-----------|---------|----------|----------|---------|------------------|------------------|----------|
| <b>From</b>                 | COOLER-1                | MIXER-3                 | FLASH-1  | LIQUID-LIQUID EXTRACTOR | REACTOR-3 | PUMP-1  | VALVE-1  | FLASH-2  | FLASH-2 | COOLER-3         | ACTIVATED CARBON | FLASH-3  |
| <b>To</b>                   | LIQUID-LIQUID EXTRACTOR | LIQUID-LIQUID EXTRACTOR | COOLER-2 | REACTOR-3               | PUMP-1    | VALVE-1 | MEMBRANE | COOLER-3 | FLASH-3 | ACTIVATED CARBON |                  | COOLER-4 |
| <b>Temperature (°C)</b>     | 25.0                    | 64.9                    | 20.0     | 25.0                    | 25.0      | 25.2    | 25.2     | 130.0    | 130.0   | 25.0             | 25.0             | 70.0     |
| <b>Pressure (bar)</b>       | 1.0                     | 1.0                     | 0.7      | 1.0                     | 1.0       | 4.5     | 4.5      | 1.0      | 1.0     | 1.0              | 1.0              | 1.0      |
| <b>Mole Flows (kmol/hr)</b> | 46.8                    | 4.5                     | 4.1      | 42.3                    | 43.4      | 43.4    | 43.4     | 4.7      | 37.9    | 4.7              | 0.1              | 28.1     |
| <b>Mole Fractions</b>       |                         |                         |          |                         |           |         |          |          |         |                  |                  |          |
| <b>GLYCEROL</b>             | 0.0897                  | 0.0000                  | 0.0000   | 0.0897                  | 0.0875    | 0.0875  | 0.0875   | 0.7914   | 0.0014  | 0.7914           | 0.0000           | 0.0000   |
| <b>METHANOL</b>             | 0.7264                  | 0.1187                  | 0.1319   | 0.7264                  | 0.7087    | 0.7087  | 0.7087   | 0.0643   | 0.8035  | 0.0643           | 0.0000           | 0.8584   |
| <b>M-OLEATE</b>             | 0.0000                  | 0.0000                  | 0.0000   | 0.0000                  | 0.0000    | 0.0000  | 0.0000   | 0.0000   | 0.0000  | 0.0000           | 0.0000           | 0.0000   |
| <b>OLE-ACID</b>             | 0.0001                  | 0.0000                  | 0.0000   | 0.0001                  | 0.0001    | 0.0001  | 0.0001   | 0.0009   | 0.0000  | 0.0009           | 0.0006           | 0.0000   |
| <b>WATER</b>                | 0.1655                  | 0.0067                  | 0.0074   | 0.1655                  | 0.1858    | 0.1858  | 0.1858   | 0.1412   | 0.1951  | 0.1412           | 0.9624           | 0.1416   |
| <b>PENTANE</b>              | 0.0000                  | 0.6601                  | 0.6220   | 0.0000                  | 0.0000    | 0.0000  | 0.0000   | 0.0000   | 0.0000  | 0.0000           | 0.0000           | 0.0000   |
| <b>HEXANE</b>               | 0.0000                  | 0.0000                  | 0.0000   | 0.0000                  | 0.0000    | 0.0000  | 0.0000   | 0.0000   | 0.0000  | 0.0000           | 0.0000           | 0.0000   |
| <b>HCL</b>                  | 0.0066                  | 0.2146                  | 0.2386   | 0.0066                  | 0.0000    | 0.0000  | 0.0000   | 0.0000   | 0.0000  | 0.0000           | 0.0000           | 0.0000   |
| <b>KCL</b>                  | 0.0116                  | 0.0000                  | 0.0000   | 0.0116                  | 0.0178    | 0.0178  | 0.0178   | 0.0016   | 0.0000  | 0.0016           | 0.0278           | 0.0000   |
| <b>KOH</b>                  | 0.0000                  | 0.0000                  | 0.0000   | 0.0000                  | 0.0001    | 0.0001  | 0.0001   | 0.0005   | 0.0000  | 0.0005           | 0.0092           | 0.0000   |
| <b>K-OLEATE</b>             | 0.0001                  | 0.0000                  | 0.0000   | 0.0001                  | 0.0001    | 0.0001  | 0.0001   | 0.0000   | 0.0000  | 0.0000           | 0.0000           | 0.0000   |

## 2.2. Mass balance for VDP process

Table S9. Mass balance for VDP process.

| VDP                  |          |         |                       |                       |          |                       |          |
|----------------------|----------|---------|-----------------------|-----------------------|----------|-----------------------|----------|
| Stream Name          | CRUDE-GL | HCL     | LIQWAST1              | LIQWAST2              | PURE-GLY | REC-METH              | S1       |
| From                 |          |         | DISTILLATION COLUMN-1 | DISTILLATION COLUMN-2 | COOLER-1 | DISTILLATION COLUMN-1 | MIXER-1  |
| To                   | MIXER-1  | MIXER-1 |                       |                       |          |                       | HEATER-1 |
| Temperature (°C)     | 25.0     | 25.0    | 103.8                 | 229.0                 | 25.0     | 62.4                  | 32.7     |
| Pressure (bar)       | 1.0      | 1.0     | 1.0                   | 0.0                   | 1.0      | 1.0                   | 1.0      |
| Mole Flows (kmol/hr) | 17.9     | 2.2     | 4.3                   | 0.8                   | 4.6      | 9.6                   | 19.8     |
| Mole Fractions       |          |         |                       |                       |          |                       |          |
| GLYCEROL             | 0.2425   | 0.0000  | 0.0394                | 0.0555                | 0.8898   | 0.0000                | 0.2197   |
| METHANOL             | 0.5227   | 0.0000  | 0.0001                | 0.0000                | 0.0264   | 0.9583                | 0.4737   |
| KOH                  | 0.0000   | 0.0000  | 0.0000                | 0.0000                | 0.0000   | 0.0000                | 0.0000   |
| M-OLEATE             | 0.0188   | 0.0000  | 0.0011                | 0.3897                | 0.0009   | 0.0000                | 0.0171   |
| HCL                  | 0.0000   | 0.0004  | 0.0000                | 0.0000                | 0.0001   | 0.0020                | 0.0082   |
| WATER                | 0.1550   | 0.5505  | 0.8875                | 0.0000                | 0.0828   | 0.0397                | 0.2405   |
| H3O+                 | 0.0000   | 0.2246  | 0.0357                | 0.0000                | 0.0000   | 0.0000                | 0.0006   |
| K+                   | 0.0174   | 0.0000  | 0.0000                | 0.0000                | 0.0000   | 0.0000                | 0.0000   |
| KCL(S)               | 0.0000   | 0.0000  | 0.0000                | 0.0000                | 0.0000   | 0.0000                | 0.0158   |
| CL-                  | 0.0000   | 0.2246  | 0.0357                | 0.0000                | 0.0000   | 0.0000                | 0.0007   |
| OH-                  | 0.0174   | 0.0000  | 0.0000                | 0.0000                | 0.0000   | 0.0000                | 0.0000   |
| OLE-ACID             | 0.0262   | 0.0000  | 0.0004                | 0.5548                | 0.0000   | 0.0000                | 0.0237   |

Table S9 continued...

| Stream Name                 | S2       | S3                    | S4      | S5                    | S6                    | S7       | SALT    |
|-----------------------------|----------|-----------------------|---------|-----------------------|-----------------------|----------|---------|
| <b>From</b>                 | HEATER-1 | FLASH-1               | FLASH-1 | FLASH-2               | DISTILLATION COLUMN-2 | PUMP-1   | FLASH-2 |
| <b>To</b>                   | FLASH    | DISTILLATION COLUMN-1 | FLASH-2 | DISTILLATION COLUMN-2 | PUMP-1                | COOLER-1 |         |
| <b>Temperature (°C)</b>     | 75.0     | 180.0                 | 180.0   | 208.0                 | 47.2                  | 47.3     | 208.0   |
| <b>Pressure (bar)</b>       | 1.0      | 1.0                   | 1.0     | 0.0                   | 0.0                   | 1.0      | 0.0     |
| <b>Mole Flows (kmol/hr)</b> | 19.8     | 14.0                  | 5.8     | 5.5                   | 4.6                   | 4.6      | 0.3     |
| <b>Mole Fractions</b>       |          |                       |         |                       |                       |          |         |
| <b>GLYCEROL</b>             | 0.2197   | 0.0122                | 0.7204  | 0.7615                | 0.8898                | 0.8898   | 0.0000  |
| <b>METHANOL</b>             | 0.4737   | 0.6613                | 0.0212  | 0.0224                | 0.0264                | 0.0264   | 0.0000  |
| <b>KOH</b>                  | 0.0000   | 0.0000                | 0.0000  | 0.0000                | 0.0000                | 0.0000   | 0.0000  |
| <b>M-OLEATE</b>             | 0.0171   | 0.0003                | 0.0574  | 0.0607                | 0.0009                | 0.0009   | 0.0000  |
| <b>HCL</b>                  | 0.0088   | 0.0125                | 0.0001  | 0.0001                | 0.0001                | 0.0001   | 0.0000  |
| <b>WATER</b>                | 0.2410   | 0.3136                | 0.0663  | 0.0700                | 0.0828                | 0.0828   | 0.0000  |
| <b>H3O+</b>                 | 0.0001   | 0.0000                | 0.0000  | 0.0000                | 0.0000                | 0.0000   | 0.0000  |
| <b>K+</b>                   | 0.0000   | 0.0000                | 0.0000  | 0.0000                | 0.0000                | 0.0000   | 0.0000  |
| <b>KCL(S)</b>               | 0.0158   | 0.0000                | 0.0538  | 0.0000                | 0.0000                | 0.0000   | 1.0000  |
| <b>CL-</b>                  | 0.0001   | 0.0000                | 0.0000  | 0.0000                | 0.0000                | 0.0000   | 0.0000  |
| <b>OH-</b>                  | 0.0000   | 0.0000                | 0.0000  | 0.0000                | 0.0000                | 0.0000   | 0.0000  |
| <b>OLE-ACID</b>             | 0.0237   | 0.0001                | 0.0807  | 0.0853                | 0.0000                | 0.0000   | 0.0000  |

### 2.3. Mass balance for IEP process

Table S10. Mass balance for IEP process.

| IEP                         |          |           |                     |           |                     |            |                     |                     |          |          |
|-----------------------------|----------|-----------|---------------------|-----------|---------------------|------------|---------------------|---------------------|----------|----------|
| Stream Name                 | CRUDEGLY | HCL       | HCL-2               | KOH       | KOH-2               | OILS       | OUTREGEN            | OUTWASH             | PURE-GLY | REC-METH |
| <b>From</b>                 |          |           |                     |           |                     | CENTRIFUGE | ION-EXCHANGE COLUMN | ION-EXCHANGE COLUMN | COOLER-3 | COOLER-2 |
| <b>To</b>                   | HEATER-1 | REACTOR-3 | ION-EXCHANGE COLUMN | REACTOR-1 | ION-EXCHANGE COLUMN |            |                     |                     |          |          |
| <b>Stream Class</b>         | CONVEN   | CONVEN    | CONVEN              | CONVEN    | CONVEN              | CONVEN     | CONVEN              | CONVEN              | CONVEN   | CONVEN   |
| <b>Temperature (°C)</b>     | 25.0     | 25.0      | 25.0                | 25.0      | 25.0                | 60.3       | 25.5                | 25.5                | 25.0     | 25.0     |
| <b>Pressure (bar)</b>       | 1.0      | 1.0       | 1.0                 | 1.0       | 1.0                 | 3.0        | 1.0                 | 1.0                 | 1.0      | 1.0      |
| <b>Mole Flows (kmol/hr)</b> | 17.6     | 2.2       | 863.1               | 2.2       | 885.0               | 0.8        | 887.2               | 867.7               | 4.4      | 10.1     |
| Mole Fractions              |          |           |                     |           |                     |            |                     |                     |          |          |
| <b>GLYCEROL</b>             | 0.2468   | 0.0000    | 0.0000              | 0.0000    | 0.0000              | 0.0516     | 0.0000              | 0.0000              | 0.9861   | 0.0000   |
| <b>METHANOL</b>             | 0.5320   | 0.0000    | 0.0000              | 0.0000    | 0.0000              | 0.0000     | 0.0000              | 0.0000              | 0.0070   | 0.9590   |
| <b>M-OLEATE</b>             | 0.0192   | 0.0000    | 0.0000              | 0.0000    | 0.0000              | 0.0000     | 0.0000              | 0.0000              | 0.0000   | 0.0000   |
| <b>OLE-ACID</b>             | 0.0267   | 0.0000    | 0.0000              | 0.0000    | 0.0000              | 0.5517     | 0.0000              | 0.0000              | 0.0011   | 0.0000   |
| <b>WATER</b>                | 0.1577   | 0.0000    | 0.9747              | 0.0000    | 0.9799              | 0.0000     | 0.9775              | 0.9753              | 0.0000   | 0.0000   |
| <b>HCL</b>                  | 0.0000   | 1.0000    | 0.0253              | 0.0000    | 0.0000              | 0.0000     | 0.0000              | 0.0247              | 0.0000   | 0.0410   |
| <b>KCL</b>                  | 0.0000   | 0.0000    | 0.0000              | 0.0000    | 0.0000              | 0.0000     | 0.0025              | 0.0000              | 0.0050   | 0.0000   |
| <b>KOH</b>                  | 0.0177   | 0.0000    | 0.0000              | 1.0000    | 0.0201              | 0.0000     | 0.0200              | 0.0000              | 0.0000   | 0.0000   |
| <b>K-OLEATE</b>             | 0.0000   | 0.0000    | 0.0000              | 0.0000    | 0.0000              | 0.3967     | 0.0000              | 0.0000              | 0.0008   | 0.0000   |

Table S10 continued...

| Stream Name                     | S1        | S2            | S3        | S4         | S5         | S6                         | S7                     | S8       | S9       | S10      |
|---------------------------------|-----------|---------------|-----------|------------|------------|----------------------------|------------------------|----------|----------|----------|
| <b>From</b>                     | HEATER-1  | REACTOR<br>-1 | REACTOR-3 | PUMP       | CENTRIFUGE | COOLER-1                   | ION-EXCHANGE<br>COLUMN | HEATER-2 | DISTIL-1 | DISTIL-1 |
| <b>To</b>                       | REACTOR-1 | REACTOR<br>-3 | PUMP      | CENTRIFUGE | COOLER-1   | ION-<br>EXCHANGE<br>COLUMN | HEATER-2               | DISTIL-1 | COOLER-3 | COOLER-2 |
| <b>Stream Class</b>             | CONVEN    | CONVEN        | CONVEN    | CONVEN     | CONVEN     | CONVEN                     | CONVEN                 | CONVEN   | CONVEN   | CONVEN   |
| <b>Temperature<br/>(°C)</b>     | 60.0      | 60.0          | 60.0      | 60.3       | 60.3       | 25.0                       | 25.5                   | 80.0     | 237.0    | 63.2     |
| <b>Pressure (bar)</b>           | 1.0       | 1.0           | 1.0       | 3.0        | 3.0        | 1.0                        | 1.0                    | 1.0      | 1.0      | 1.0      |
| <b>Mole Flows<br/>(kmol/hr)</b> | 17.6      | 19.8          | 22.0      | 22.0       | 21.2       | 21.2                       | 14.4                   | 14.4     | 4.4      | 10.1     |
| <b>Mole Fractions</b>           |           |               |           |            |            |                            |                        |          |          |          |
| <b>GLYCEROL</b>                 | 0.2468    | 0.2191        | 0.1972    | 0.1972     | 0.2030     | 0.2030                     | 0.2977                 | 0.2977   | 0.9861   | 0.0000   |
| <b>METHANOL</b>                 | 0.5320    | 0.4893        | 0.4404    | 0.4404     | 0.4579     | 0.4579                     | 0.6716                 | 0.6716   | 0.0070   | 0.9590   |
| <b>M-OLEATE</b>                 | 0.0192    | 0.0000        | 0.0000    | 0.0000     | 0.0000     | 0.0000                     | 0.0000                 | 0.0000   | 0.0000   | 0.0000   |
| <b>OLE-ACID</b>                 | 0.0267    | 0.0237        | 0.0213    | 0.0213     | 0.0002     | 0.0002                     | 0.0003                 | 0.0003   | 0.0011   | 0.0000   |
| <b>WATER</b>                    | 0.1577    | 0.1400        | 0.2259    | 0.2259     | 0.2349     | 0.2349                     | 0.0000                 | 0.0000   | 0.0000   | 0.0000   |
| <b>HCL</b>                      | 0.0000    | 0.0000        | 0.0000    | 0.0000     | 0.0000     | 0.0000                     | 0.0287                 | 0.0287   | 0.0000   | 0.0410   |
| <b>KCL</b>                      | 0.0000    | 0.0000        | 0.0999    | 0.0999     | 0.1038     | 0.1038                     | 0.0015                 | 0.0015   | 0.0050   | 0.0000   |
| <b>KOH</b>                      | 0.0177    | 0.1110        | 0.0000    | 0.0000     | 0.0000     | 0.0000                     | 0.0000                 | 0.0000   | 0.0000   | 0.0000   |
| <b>K-OLEATE</b>                 | 0.0000    | 0.0170        | 0.0153    | 0.0153     | 0.0002     | 0.0002                     | 0.0002                 | 0.0002   | 0.0008   | 0.0000   |
